# Supplementary material for: Temporal trends in incidence of Rolandic epilepsy, prevalence of comorbidities and prescribing trends: birth cohort study
Source: PubMed Central journal article supplement — Arch Dis Child. 2020 Jan 14;105(6):569–74. doi: 10.1136/archdischild-2019-318212 (PMC7285789; doi:10.1136/archdischild-2019-318212), 2020-01-14

## Appendix

Supplemental Table 1. Number of practices with available mid-year population counts, number merged and withdrawn and total mid-year population for males and females over contributing age groups by year.

| Year    | Number of practices | Merged | Withdrawn | Age (years) | Total mid-year population |           |
|---------|---------------------|--------|-----------|-------------|---------------------------|-----------|
|         |                     |        |           |             | Males                     | Females   |
| 1994    | 1                   | 0      | 0         | 0           | -                         | -         |
| 1995    | 4                   | 0      | 0         | 1           | -                         | -         |
| 1996    | 52                  | 0      | 0         | 2           | -                         | -         |
| 1997    | 106                 | 0      | 0         | 3           | -                         | -         |
| 1998    | 142                 | 0      | 0         | 4           | 6,925                     | 6,217     |
| 1999    | 188                 | 0      | 0         | 4-5         | 17,838                    | 15,945    |
| 2000    | 290                 | 0      | 0         | 4-6         | 39,923                    | 35,651    |
| 2001    | 378                 | 0      | 0         | 4-7         | 68,098                    | 61,248    |
| 2002    | 476                 | 0      | 0         | 4-8         | 102,935                   | 93,937    |
| 2003    | 506                 | 0      | 3         | 4-9         | 129,166                   | 118,647   |
| 2004    | 557                 | 0      | 2         | 4-10        | 165,830                   | 152,828   |
| 2005    | 581                 | 0      | 1         | 4-11        | 196,520                   | 181,979   |
| 2006    | 604                 | 0      | 4         | 4-12        | 226,112                   | 209,949   |
| 2007    | 637                 | 0      | 5         | 4-13        | 261,446                   | 243,529   |
| 2008    | 670                 | 0      | 9         | 4-15        | 304,844                   | 284,282   |
| 2009    | 679                 | 0      | 17        | 4-16        | 339,420                   | 316,944   |
| 2010    | 667                 | 0      | 14        | 4-16        | 361,040                   | 337,664   |
| 2011    | 686                 | 0      | 14        | 4-16        | 376,362                   | 354,506   |
| 2012    | 683                 | 0      | 20        | 4-16        | 381,853                   | 361,561   |
| 2013    | 659                 | 4      | 40        | 4-16        | 375,728                   | 356,370   |
| 2014    | 614                 | 1      | 65        | 4-16        | 355,075                   | 338,450   |
| 2015    | 526                 | 3      | 91        | 4-16        | 309,121                   | 295,669   |
| 2016    | 454                 | 3      | 49        | 4-16        | 263,366                   | 251,912   |
| 2017    | 398                 | 8      | 29        | 5-16        | 214,721                   | 205,978   |
| Overall | 774                 | 19     | 363       | 4-16        | 4,496,323                 | 4,223,266 |

Supplemental Table 2: Read Codes for comorbidities

| Type            | Read Codes                  | Description                                                 |                                   |
|-----------------|-----------------------------|-------------------------------------------------------------|-----------------------------------|
| School Problems | 13Z4C00                     | Behavioural problems at school                              |                                   |
|                 | 13Z4E00                     | Learning difficulties                                       |                                   |
|                 | 13Z5.00                     | Literacy problems                                           |                                   |
|                 | 13ZK.00                     | Child with special educational needs                        |                                   |
|                 | 13ZK000                     | Has statement of special educational needs                  |                                   |
|                 | 13ZK100                     | Statement of special educational needs stopped              |                                   |
|                 | Eu81.00                     | [X]Specific developmental disorders of scholastic skills    |                                   |
|                 | Eu81000                     | [X]Specific reading disorder                                |                                   |
|                 | Eu81011                     | [X]Backward reading                                         |                                   |
|                 | Eu81012                     | [X]Developmental dyslexia                                   |                                   |
|                 | Eu81013                     | [X]Specific reading retardation                             |                                   |
|                 | Eu81100                     | [X]Specific spelling disorder                               |                                   |
|                 | Eu81111                     | [X]Specific spelling retardation without reading disorder   |                                   |
|                 | Eu81200                     | [X]Specific disorder of arithmetical skills                 |                                   |
|                 | Eu81211                     | [X]Developmental acalculia                                  |                                   |
|                 | Eu81213                     | [X]Developmental Gerstmann's syndrome                       |                                   |
|                 | Eu81300                     | [X]Mixed disorder of scholastic skills                      |                                   |
|                 | Eu81400                     | [X]Moderate learning disability                             |                                   |
|                 | Eu81500                     | [X]Severe learning disability                               |                                   |
|                 | Eu81600                     | [X]Mild learning disability                                 |                                   |
|                 | Eu81700                     | [X]Profound learning disability                             |                                   |
|                 | Eu81800                     | [X]Specific learning disability                             |                                   |
|                 | Eu81y00                     | [X]Other developmental disorders of scholastic skills       |                                   |
|                 | Eu81y11                     | [X]Developmental expressive writing disorder                |                                   |
|                 | Eu81z00                     | [X]Developmental disorder of scholastic skills, unspecified |                                   |
|                 | Eu81z11                     | [X]Learning disability NOS                                  |                                   |
|                 | Eu81z12                     | [X]Learning disorder NOS                                    |                                   |
|                 | Eu81z13                     | [X]Learn acquisition disab NOS                              |                                   |
|                 | Developmental (unspecified) | 14g..00                                                     | History of developmental disorder |
|                 |                             | E2F5.00                                                     | Mixed development disorder        |
| E2F5.11         |                             | Global delay                                                |                                   |
| E2Fz.00         |                             | Developmental disorder NOS                                  |                                   |
| Eu...00         |                             | [X]Mental and behavioural disorders                         |                                   |
| Eu85.00         |                             | [X]Global developmental delay                               |                                   |

| Type                    | Read Codes | Description                                                  |
|-------------------------|------------|--------------------------------------------------------------|
|                         | 1J9..00    | Suspected autism                                             |
|                         | Eu84.00    | [X]Pervasive developmental disorders                         |
|                         | Eu84000    | [X]Childhood autism                                          |
|                         | Eu84011    | [X]Autistic disorder                                         |
|                         | Eu84012    | [X]Infantile autism                                          |
|                         | Eu84013    | [X]Infantile psychosis                                       |
|                         | Eu84014    | [X]Kanner's syndrome                                         |
|                         | Eu84100    | [X]Atypical autism                                           |
|                         | Eu84111    | [X]Atypical childhood psychosis                              |
|                         | Eu84112    | [X]Mental retardation with autistic features                 |
|                         | Eu84200    | [X]Rett's syndrome                                           |
| Pervasive developmental | Eu84300    | [X]Other childhood disintegrative disorder                   |
|                         | Eu84311    | [X]Dementia infantalis                                       |
|                         | Eu84312    | [X]Disintegrative psychosis                                  |
|                         | Eu84313    | [X]Heller's syndrome                                         |
|                         | Eu84314    | [X]Symbiotic psychosis                                       |
|                         | Eu84400    | [X]Overactive disorder assoc mental retard/stereotype movts  |
|                         | Eu84500    | [X]Asperger's syndrome                                       |
|                         | Eu84511    | [X]Autistic psychopathy                                      |
|                         | Eu84512    | [X]Schizoid disorder of childhood                            |
|                         | Eu84600    | Pathological demand avoidance                                |
|                         | Eu84y00    | [X]Other pervasive developmental disorders                   |
|                         | Eu84z00    | [X]Pervasive developmental disorder, unspecified             |
|                         | Eu84z11    | [X]Autistic spectrum disorder                                |
|                         | Eu80.00    | [X]Specific developmental disorders of speech and language   |
|                         | Eu80000    | [X]Specific speech articulation disorder                     |
|                         | Eu80011    | [X]Developmental phonological disorder                       |
|                         | Eu80012    | [X]Developmental speech articulation disorder                |
|                         | Eu80013    | [X]Dyslalia                                                  |
|                         | Eu80014    | [X]Functional speech articulation disorder                   |
|                         | Eu80100    | [X]Expressive language disorder                              |
|                         | Eu80111    | [X]Developmental dysphasia, expressive type                  |
|                         | Eu80112    | [X]Developmental aphasia, expressive type                    |
|                         | Eu80200    | [X]Receptive language disorder                               |
| Speech and language     | Eu80211    | [X]Congenital auditory imperception                          |
|                         | Eu80212    | [X]Developmental dysphasia, receptive type                   |
|                         | Eu80213    | [X]Developmental Wernicke's aphasia                          |
|                         | Eu80214    | [X]Word deafness                                             |
|                         | Eu80215    | [X]Developmental aphasia, receptive type                     |
|                         | Eu80300    | [X]Acquired aphasia with epilepsy [Landau - Kleffner]        |
|                         | Eu80400    | [X]Cocktail party syndrome                                   |
|                         | Eu80500    | [X]Semantic-pragmatic disorder                               |
|                         | Eu80600    | [X]Auditory processing disorder                              |
|                         | Eu80B00    | [X]Speech disorder                                           |
|                         | Eu80y00    | [X]Other developmental disorders of speech and language      |
|                         | Eu80y11    | [X]Lisping                                                   |
|                         | Eu80z00    | [X]Developmental disorder of speech and language unspecified |

| Type                                                   | Read Codes                          | Description                                                   |                                                      |
|--------------------------------------------------------|-------------------------------------|---------------------------------------------------------------|------------------------------------------------------|
| Behavioural/emotional/social functioning/mental health | Eu9..00                             | [X]Behavioural/emotional disor ds onset childhood/adolescence |                                                      |
|                                                        | Eu91.00                             | [X]Conduct disorders                                          |                                                      |
|                                                        | Eu91000                             | [X]Conduct disorder confined to the family context            |                                                      |
|                                                        | Eu91100                             | [X]Unsocialized conduct disorder                              |                                                      |
|                                                        | Eu91111                             | [X]Conduct disorder, solitary aggressive type                 |                                                      |
|                                                        | Eu91112                             | [X]Unsocialised aggressive disorder                           |                                                      |
|                                                        | Eu91200                             | [X]Socialized conduct disorder                                |                                                      |
|                                                        | Eu91213                             | [X]Offences in the context of gang membership                 |                                                      |
|                                                        | Eu91214                             | [X]Stealing in company of others                              |                                                      |
|                                                        | Eu91215                             | [X]Truancy from school                                        |                                                      |
|                                                        | Eu91300                             | [X]Oppositional defiant disorder                              |                                                      |
|                                                        | Eu91y00                             | [X]Other conduct disorders                                    |                                                      |
|                                                        | Eu91z00                             | [X]Conduct disorder, unspecified                              |                                                      |
|                                                        | Eu91z11                             | [X]Childhood behavioural disorder NOS                         |                                                      |
|                                                        | Eu91z12                             | [X]Childhood conduct disorder NOS                             |                                                      |
|                                                        | Eu94.00                             | [X]Disorder social funct onset specific childhood/adolesc     |                                                      |
|                                                        | Eu94000                             | [X]Elective mutism                                            |                                                      |
|                                                        | Eu94011                             | [X>Selective mutism                                           |                                                      |
|                                                        | Eu94100                             | [X]Reactive attachment disorder of childhood                  |                                                      |
|                                                        | Eu94200                             | [X]Disinhibited attachment disorder of childhood              |                                                      |
|                                                        | Eu94211                             | [X]Affectionless psychopathy                                  |                                                      |
|                                                        | Eu94212                             | [X]Institutional syndrome                                     |                                                      |
|                                                        | Eu94y00                             | [X]Other childhood disorders of social functioning            |                                                      |
|                                                        | Eu94z00                             | [X]Childhood disorder of social functioning, unspecified      |                                                      |
|                                                        | Eu9y.00                             | [X]Oth behav emotion disorder onset usual occur childhd/adol  |                                                      |
|                                                        | Eu9y000                             | [X]Nonorganic enuresis                                        |                                                      |
|                                                        | Eu9y100                             | [X]Nonorganic encopresis                                      |                                                      |
|                                                        | Eu9y200                             | [X]Feeding disorder of infancy and childhood                  |                                                      |
|                                                        | Eu9y300                             | [X]Pica of infancy and childhood                              |                                                      |
|                                                        | Eu9y400                             | [X]Stereotyped movement disorders                             |                                                      |
|                                                        | Eu9y500                             | [X]Stuttering [stammering]                                    |                                                      |
|                                                        | Eu9y600                             | [X]Cluttering                                                 |                                                      |
|                                                        | Eu9y700                             | [X]Attention deficit disorder                                 |                                                      |
|                                                        | Eu9yy00                             | [X]Ot spc behav emotion disorder onst usual childhood adoles  |                                                      |
|                                                        | Eu9yz00                             | [X]Unspec behav emotion disorder onst usual childhood adoles  |                                                      |
|                                                        | Motor function/hyperkinetic/<br>Tic | Eu82.00                                                       | [X]Specific developmental disorder of motor function |
|                                                        |                                     | Eu82.11                                                       | [X]Clumsy child syndrome                             |
|                                                        |                                     | Eu82.12                                                       | [X]Developmental co - ordination disorder            |
|                                                        |                                     | Eu82.13                                                       | [X]Developmental dyspraxia                           |
|                                                        |                                     | Eu90.00                                                       | [X]Hyperkinetic disorders                            |
|                                                        |                                     | Eu90000                                                       | [X]Disturbance of activity and attention             |
|                                                        |                                     | Eu90011                                                       | [X]Attention deficit hyperactivity disorder          |
|                                                        |                                     | Eu90100                                                       | [X]Hyperkinetic conduct disorder                     |
| Eu90111                                                |                                     | [X]Hyperkinetic disorder associated with conduct disorder     |                                                      |
| Eu90200                                                |                                     | [X]Deficits in attention, motor control and perception        |                                                      |
| Eu90y00                                                |                                     | [X]Other hyperkinetic disorders                               |                                                      |
| Eu90z00                                                |                                     | [X]Hyperkinetic disorder, unspecified                         |                                                      |

---

| Type | Read Codes | Description                                                |
|------|------------|------------------------------------------------------------|
|      | Eu90z12    | [X]Hyperkinetic syndrome NOS                               |
|      | Eu95.00    | [X]Tic disorders                                           |
|      | Eu95000    | [X]Transient tic disorder                                  |
|      | Eu95100    | [X]Chronic motor or vocal tic disorder                     |
|      | Eu95200    | [X]Comb vocal multiple motor tic disorder - de la Tourette |
|      | Eu95300    | [X]Involuntary excessive blinking                          |
|      | Eu95y00    | [X]Other tic disorders                                     |
|      | Eu95z00    | [X]Tic disorder, unspecified                               |

---

Supplemental Table 3: Codes for AEDs

| Drug Name                              | Generic                                        | Drug Code |
|----------------------------------------|------------------------------------------------|-----------|
| ACETAZOLAMIDE                          | ACETAZOLAMIDE                                  | 96988996  |
|                                        | ACETAZOLAMIDE                                  | 94914992  |
|                                        | ACETAZOLAMIDE                                  | 86429998  |
|                                        | ACETAZOLAMIDE                                  | 85486998  |
|                                        | ACETAZOLAMIDE mr cap 250mg                     | 97782998  |
|                                        | ACETAZOLAMIDE mr cap 250mg                     | 89008998  |
|                                        | Acetazolamide mr cap 250mg 30 capsule(s)       | 96987997  |
|                                        | ACETAZOLAMIDE mr cap 500mg                     | 99762998  |
|                                        | Acetazolamide mr cap 500mg 30 capsule(s)       | 96987998  |
|                                        | Acetazolamide oral liq                         | 85786998  |
|                                        | ACETAZOLAMIDE oral susp 250mg/5ml              | 93224990  |
|                                        | ACETAZOLAMIDE pwdr                             | 96985998  |
|                                        | Acetazolamide pwdr 1 25g bottle                | 96988997  |
|                                        | ACETAZOLAMIDE SODIUM inj 500mg                 | 98328997  |
|                                        | ACETAZOLAMIDE SODIUM inj 500mg                 | 91643998  |
|                                        | Acetazolamide sodium inj 500mg 1 500mg vial(s) | 96986998  |
|                                        | ACETAZOLAMIDE syrpf 40mg/ml                    | 97185990  |
|                                        | ACETAZOLAMIDE tabs 250mg                       | 98928998  |
|                                        | ACETAZOLAMIDE tabs 250mg                       | 98328998  |
|                                        | ACETAZOLAMIDE tabs 250mg                       | 94772990  |
| ACETAZOLAMIDE tabs 250mg               | 93709990                                       |           |
| Acetazolamide tabs 250mg 112 tablet(s) | 96988998                                       |           |
| BECLAMIDE                              | BECLAMIDE tabs 500mg                           | 99332998  |
|                                        | Beclamide tabs 500mg 1 tablet(s)               | 96914998  |
| CARBAMAZEPINE                          | CARBAMAZEPINE                                  | 84311998  |
|                                        | CARBAMAZEPINE 100mg/5mL sf liq                 | 96479992  |
|                                        | CARBAMAZEPINE chewable tab 100mg               | 93531998  |
|                                        | Carbamazepine chewable tab 100mg 56 tablet(s)  | 93530998  |
|                                        | CARBAMAZEPINE chewable tab 200mg               | 93531997  |
|                                        | Carbamazepine chewable tab 200mg 56 tablet(s)  | 93530997  |
|                                        | CARBAMAZEPINE liq 100mg/5ml                    | 98360998  |
|                                        | Carbamazepine liq 100mg/5ml 300 mls            | 96885998  |
|                                        | CARBAMAZEPINE mr tab 200mg                     | 97128990  |
|                                        | CARBAMAZEPINE mr tab 200mg                     | 97086998  |
|                                        | CARBAMAZEPINE mr tab 200mg                     | 96536990  |
|                                        | CARBAMAZEPINE mr tab 200mg                     | 96446990  |
|                                        | CARBAMAZEPINE mr tab 200mg                     | 96128990  |
|                                        | CARBAMAZEPINE mr tab 200mg                     | 93532998  |
|                                        | CARBAMAZEPINE mr tab 200mg                     | 92283998  |
|                                        | CARBAMAZEPINE mr tab 200mg                     | 92131998  |
|                                        | CARBAMAZEPINE mr tab 200mg                     | 89384998  |
|                                        | CARBAMAZEPINE mr tab 200mg                     | 88217998  |
|                                        | Carbamazepine mr tab 200mg 30 tablet(s)        | 93579998  |
|                                        | CARBAMAZEPINE mr tab 400mg                     | 97128989  |

| Drug Name | Generic                                     | Drug Code |
|-----------|---------------------------------------------|-----------|
|           | CARBAMAZEPINE mr tab 400mg                  | 96536989  |
|           | CARBAMAZEPINE mr tab 400mg                  | 96446989  |
|           | CARBAMAZEPINE mr tab 400mg                  | 96127990  |
|           | CARBAMAZEPINE mr tab 400mg                  | 93532997  |
|           | CARBAMAZEPINE mr tab 400mg                  | 92378998  |
|           | CARBAMAZEPINE mr tab 400mg                  | 92282998  |
|           | CARBAMAZEPINE mr tab 400mg                  | 92131997  |
|           | CARBAMAZEPINE mr tab 400mg                  | 89384997  |
|           | CARBAMAZEPINE mr tab 400mg                  | 88217997  |
|           | Carbamazepine mr tab 400mg 30 tablet(s)     | 93579997  |
|           | Carbamazepine oral liq                      | 85159998  |
|           | CARBAMAZEPINE oral susp 500mg/5ml           | 92973990  |
|           | CARBAMAZEPINE supp 125mg                    | 92735998  |
|           | Carbamazepine supp 125mg 5 suppository(ies) | 92734998  |
|           | CARBAMAZEPINE supp 250mg                    | 92735997  |
|           | Carbamazepine supp 250mg 5 suppository(ies) | 92734997  |
|           | CARBAMAZEPINE tabs 100mg                    | 99752990  |
|           | CARBAMAZEPINE tabs 100mg                    | 99751990  |
|           | CARBAMAZEPINE tabs 100mg                    | 98361998  |
|           | CARBAMAZEPINE tabs 100mg                    | 98338990  |
|           | CARBAMAZEPINE tabs 100mg                    | 97779990  |
|           | CARBAMAZEPINE tabs 100mg                    | 96916990  |
|           | CARBAMAZEPINE tabs 100mg                    | 96697989  |
|           | CARBAMAZEPINE tabs 100mg                    | 92837998  |
|           | Carbamazepine tabs 100mg 56 tablet(s)       | 97033998  |
|           | CARBAMAZEPINE tabs 200mg                    | 99752989  |
|           | CARBAMAZEPINE tabs 200mg                    | 99751989  |
|           | CARBAMAZEPINE tabs 200mg                    | 98361997  |
|           | CARBAMAZEPINE tabs 200mg                    | 98338989  |
|           | CARBAMAZEPINE tabs 200mg                    | 97779989  |
|           | CARBAMAZEPINE tabs 200mg                    | 96916989  |
|           | CARBAMAZEPINE tabs 200mg                    | 96697988  |
|           | CARBAMAZEPINE tabs 200mg                    | 92837997  |
|           | Carbamazepine tabs 200mg 56 tablet(s)       | 97033997  |
|           | CARBAMAZEPINE tabs 400mg                    | 99752988  |
|           | CARBAMAZEPINE tabs 400mg                    | 99751988  |
|           | CARBAMAZEPINE tabs 400mg                    | 98361996  |
|           | CARBAMAZEPINE tabs 400mg                    | 98338988  |
|           | CARBAMAZEPINE tabs 400mg                    | 97779988  |
|           | CARBAMAZEPINE tabs 400mg                    | 96916988  |
|           | CARBAMAZEPINE tabs 400mg                    | 96697990  |
|           | CARBAMAZEPINE tabs 400mg                    | 92837996  |
|           | Carbamazepine tabs 400mg tablet(s) 28       | 97033996  |
|           | CLOBAZAM                                    | 97161992  |
|           | CLOBAZAM                                    | 97160992  |
| CLOBAZAM  | CLOBAZAM                                    | 97159992  |
|           | CLOBAZAM                                    | 97158992  |
|           | CLOBAZAM                                    | 96160992  |

| Drug Name       | Generic                                          | Drug Code |
|-----------------|--------------------------------------------------|-----------|
|                 | CLOBAZAM                                         | 86457998  |
|                 | CLOBAZAM                                         | 86161998  |
|                 | CLOBAZAM caps 10mg                               | 99622998  |
|                 | Clobazam caps 10mg 30 capsule(s)                 | 96648998  |
|                 | Clobazam caps capsule(s) 1                       | 85423998  |
|                 | Clobazam oral liq                                | 85424998  |
|                 | CLOBAZAM oral soln 25mg/5ml                      | 82713998  |
|                 | CLOBAZAM oral susp 10mg/5ml                      | 93727990  |
|                 | CLOBAZAM oral susp 25mg/5ml                      | 82714998  |
|                 | CLOBAZAM tabs 10mg                               | 99622997  |
|                 | CLOBAZAM tabs 10mg                               | 93529990  |
|                 | Clobazam tabs 10mg 30 tablet(s)                  | 96648997  |
|                 | CLONAZEPAM                                       | 88423998  |
|                 | CLONAZEPAM                                       | 85559998  |
|                 | CLONAZEPAM conc soln inj 1mg/1ml                 | 98517998  |
|                 | Clonazepam conc soln inj 1mg/1ml 5 ampoule + wfi | 96634996  |
|                 | CLONAZEPAM oral drops 2.5mg/ml                   | 88422998  |
|                 | Clonazepam oral liq                              | 85633998  |
|                 | CLONAZEPAM sf oral soln 2mg/5ml                  | 96571990  |
|                 | Clonazepam sf oral soln 2mg/5ml 150 mls          | 88423996  |
|                 | CLONAZEPAM sf soln 500micrograms/5ml             | 93913990  |
| CLONAZEPAM      | Clonazepam sf soln 500micrograms/5ml mls 150     | 86604998  |
|                 | Clonazepam susp 500micrograms/5ml 150 mls        | 88423997  |
|                 | CLONAZEPAM tabs 2mg                              | 92356990  |
|                 | CLONAZEPAM tabs 2mg                              | 99176997  |
|                 | CLONAZEPAM tabs 2mg                              | 92797990  |
|                 | Clonazepam tabs 2mg 100 tablet(s)                | 96634997  |
|                 | CLONAZEPAM tabs 500 micrograms                   | 92357990  |
|                 | CLONAZEPAM tabs 500 micrograms                   | 99176998  |
|                 | CLONAZEPAM tabs 500 micrograms                   | 92796990  |
|                 | Clonazepam tabs 500 micrograms 100 tablet(s)     | 96634998  |
| DIAZEPAM        | DIAZEPAM caps 10mg                               | 98991998  |
| ESLICARBAZEPINE | ESLICARBAZEPINE ACETATE tabs 800mg               | 82574998  |
|                 | ESLICARBAZEPINE ACETATE tabs 800mg               | 82576998  |
|                 | ETHOSUXIMIDE                                     | 97402992  |
|                 | ETHOSUXIMIDE                                     | 95750992  |
|                 | ETHOSUXIMIDE caps 250mg                          | 99697998  |
|                 | ETHOSUXIMIDE caps 250mg                          | 98949998  |
|                 | ETHOSUXIMIDE caps 250mg                          | 93114990  |
| ETHOSUXIMIDE    | ETHOSUXIMIDE caps 250mg                          | 86109998  |
|                 | Ethosuximide caps 250mg 56 capsule(s)            | 96767998  |
|                 | ETHOSUXIMIDE syrpf 250mg/5ml                     | 99697997  |
|                 | ETHOSUXIMIDE syrpf 250mg/5ml                     | 98949997  |
|                 | ETHOSUXIMIDE syrpf 250mg/5ml                     | 85954998  |
|                 | Ethosuximide syrpf 250mg/5ml 200 mls             | 96767997  |
|                 | ETHOTOIN                                         | 97401992  |
| ETHOTOIN        | ETHOTOIN                                         | 94272992  |



| Drug Name           | Generic                                                                                   | Drug Code |
|---------------------|-------------------------------------------------------------------------------------------|-----------|
| FLUNITRAZEPAM       | FLUNITRAZEPAM tabs 1mg                                                                    | 99170998  |
| FOSPHENYTOIN SODIUM | FOSPHENYTOIN SODIUM conc for inj 750mg/10ml                                               | 92064998  |
|                     | Fosphenytoin sodium conc for inj 75mg/ml 10 10ml vial(s)                                  | 89991998  |
|                     | GABAPENTIN                                                                                | 86485998  |
|                     | GABAPENTIN                                                                                | 86362998  |
|                     | GABAPENTIN caps & tabs 300mg + 600mg                                                      | 90424998  |
|                     | Gabapentin caps & tabs 300mg + 600mg 1 titration pack (40 x 300mg caps + 10 x 600mg tabs) | 90425998  |
|                     | GABAPENTIN caps 100mg                                                                     | 95190990  |
|                     | GABAPENTIN caps 100mg                                                                     | 95161990  |
|                     | GABAPENTIN caps 100mg                                                                     | 94834998  |
|                     | GABAPENTIN caps 100mg                                                                     | 94167990  |
|                     | GABAPENTIN caps 100mg                                                                     | 94123990  |
|                     | GABAPENTIN caps 100mg                                                                     | 93812990  |
|                     | GABAPENTIN caps 100mg                                                                     | 93051990  |
|                     | GABAPENTIN caps 100mg                                                                     | 92969990  |
|                     | GABAPENTIN caps 100mg                                                                     | 92872990  |
|                     | Gabapentin caps 100mg 100 capsule(s)                                                      | 94835998  |
|                     | GABAPENTIN caps 300mg                                                                     | 95189990  |
|                     | GABAPENTIN caps 300mg                                                                     | 95159990  |
|                     | GABAPENTIN caps 300mg                                                                     | 94834997  |
|                     | GABAPENTIN caps 300mg                                                                     | 94166990  |
|                     | GABAPENTIN caps 300mg                                                                     | 94122990  |
|                     | GABAPENTIN caps 300mg                                                                     | 94116990  |
| GABAPENTIN          | GABAPENTIN caps 300mg                                                                     | 93811990  |
|                     | GABAPENTIN caps 300mg                                                                     | 92968990  |
|                     | GABAPENTIN caps 300mg                                                                     | 92871990  |
|                     | Gabapentin caps 300mg 100 capsule(s)                                                      | 94835997  |
|                     | GABAPENTIN caps 400mg                                                                     | 95188990  |
|                     | GABAPENTIN caps 400mg                                                                     | 95158990  |
|                     | GABAPENTIN caps 400mg                                                                     | 94834996  |
|                     | GABAPENTIN caps 400mg                                                                     | 94165990  |
|                     | GABAPENTIN caps 400mg                                                                     | 94121990  |
|                     | GABAPENTIN caps 400mg                                                                     | 93810990  |
|                     | GABAPENTIN caps 400mg                                                                     | 93050990  |
|                     | GABAPENTIN caps 400mg                                                                     | 92870990  |
|                     | Gabapentin caps 400mg 100 capsule(s)                                                      | 94835996  |
|                     | Gabapentin oral liq                                                                       | 85753998  |
|                     | GABAPENTIN oral soln 250mg/5ml                                                            | 93743990  |
|                     | GABAPENTIN tabs 600mg                                                                     | 92463990  |
|                     | GABAPENTIN tabs 600mg                                                                     | 92503990  |
|                     | GABAPENTIN tabs 600mg                                                                     | 95187990  |
|                     | GABAPENTIN tabs 600mg                                                                     | 95157990  |
|                     | GABAPENTIN tabs 600mg                                                                     | 90426998  |
|                     | Gabapentin tabs 600mg 100 tablet(s)                                                       | 98989998  |
|                     | GABAPENTIN tabs 800mg                                                                     | 92462990  |
|                     | GABAPENTIN tabs 800mg                                                                     | 92502990  |

| Drug Name                         | Generic                                      | Drug Code |
|-----------------------------------|----------------------------------------------|-----------|
|                                   | GABAPENTIN tabs 800mg                        | 95186990  |
|                                   | GABAPENTIN tabs 800mg                        | 95156990  |
|                                   | GABAPENTIN tabs 800mg                        | 90426997  |
|                                   | Gabapentin tabs 800mg 100 tablet(s)          | 98989997  |
| LACOSAMIDE                        | LACOSAMIDE soln for inf 200mg/20ml           | 83517998  |
|                                   | Lacosamide soln for inf 200mg/20ml vial(s) 1 | 83518998  |
|                                   | LACOSAMIDE syrp 15mg/ml                      | 83515998  |
|                                   | Lacosamide syrp 15mg/ml mls 200              | 83516998  |
|                                   | LACOSAMIDE tabs 100mg                        | 83513998  |
|                                   | Lacosamide tabs 100mg tablet(s) 56           | 83514998  |
|                                   | LACOSAMIDE tabs 150mg                        | 83511998  |
|                                   | Lacosamide tabs 150mg tablet(s) 56           | 83512998  |
|                                   | LACOSAMIDE tabs 200mg                        | 83509998  |
|                                   | Lacosamide tabs 200mg tablet(s) 56           | 83510998  |
|                                   | LACOSAMIDE tabs 50mg                         | 83507998  |
| Lacosamide tabs 50mg tablet(s) 14 | 83508998                                     |           |
| Lamotrigine                       | Lamotrigine (ipu) disp tab 200mg             | 85379998  |
|                                   | LAMOTRIGINE 50mg tablets                     | 93460992  |
|                                   | LAMOTRIGINE disp tab 100mg                   | 94100990  |
|                                   | LAMOTRIGINE disp tab 100mg                   | 94087990  |
|                                   | LAMOTRIGINE disp tab 100mg                   | 94043990  |
|                                   | LAMOTRIGINE disp tab 100mg                   | 94008990  |
|                                   | LAMOTRIGINE disp tab 100mg                   | 93933990  |
|                                   | LAMOTRIGINE disp tab 100mg                   | 93876990  |
|                                   | LAMOTRIGINE disp tab 100mg                   | 93772990  |
|                                   | LAMOTRIGINE disp tab 100mg                   | 93687990  |
|                                   | LAMOTRIGINE disp tab 100mg                   | 93501990  |
|                                   | LAMOTRIGINE disp tab 100mg                   | 93062990  |
|                                   | LAMOTRIGINE disp tab 100mg                   | 93047990  |
|                                   | LAMOTRIGINE disp tab 100mg                   | 92807990  |
|                                   | LAMOTRIGINE disp tab 100mg                   | 92709996  |
|                                   | Lamotrigine disp tab 100mg 56 tablet(s)      | 92700996  |
|                                   | LAMOTRIGINE disp tab 25mg                    | 94101990  |
|                                   | LAMOTRIGINE disp tab 25mg                    | 94088990  |
|                                   | LAMOTRIGINE disp tab 25mg                    | 94044990  |
|                                   | LAMOTRIGINE disp tab 25mg                    | 94009990  |
|                                   | LAMOTRIGINE disp tab 25mg                    | 93934990  |
|                                   | LAMOTRIGINE disp tab 25mg                    | 93877990  |
|                                   | LAMOTRIGINE disp tab 25mg                    | 93771990  |
|                                   | LAMOTRIGINE disp tab 25mg                    | 93688990  |
|                                   | LAMOTRIGINE disp tab 25mg                    | 93511990  |
|                                   | LAMOTRIGINE disp tab 25mg                    | 93063990  |
|                                   | LAMOTRIGINE disp tab 25mg                    | 93048990  |
|                                   | LAMOTRIGINE disp tab 25mg                    | 92806990  |
|                                   | LAMOTRIGINE disp tab 25mg                    | 92709997  |
|                                   | Lamotrigine disp tab 25mg 56 tablet(s)       | 92700997  |
|                                   | LAMOTRIGINE disp tab 2mg                     | 93770990  |
|                                   | LAMOTRIGINE disp tab 2mg                     | 91596997  |

| Drug Name | Generic                                | Drug Code |
|-----------|----------------------------------------|-----------|
|           | Lamotrigine disp tab 2mg 30 tablet(s)  | 91465997  |
|           | LAMOTRIGINE disp tab 50mg              | 93500990  |
|           | Lamotrigine disp tab 50mg tablet(s) 56 | 86019998  |
|           | LAMOTRIGINE disp tab 5mg               | 94089990  |
|           | LAMOTRIGINE disp tab 5mg               | 94045990  |
|           | LAMOTRIGINE disp tab 5mg               | 93935990  |
|           | LAMOTRIGINE disp tab 5mg               | 93878990  |
|           | LAMOTRIGINE disp tab 5mg               | 93769990  |
|           | LAMOTRIGINE disp tab 5mg               | 93527990  |
|           | LAMOTRIGINE disp tab 5mg               | 93512990  |
|           | LAMOTRIGINE disp tab 5mg               | 93064990  |
|           | LAMOTRIGINE disp tab 5mg               | 93049990  |
|           | LAMOTRIGINE disp tab 5mg               | 92709998  |
|           | Lamotrigine disp tab 5mg 28 tablet(s)  | 92700998  |
|           | Lamotrigine oral liq                   | 84903998  |
|           | LAMOTRIGINE tabs 100mg                 | 95404997  |
|           | LAMOTRIGINE tabs 100mg                 | 94118990  |
|           | LAMOTRIGINE tabs 100mg                 | 94103990  |
|           | LAMOTRIGINE tabs 100mg                 | 94097990  |
|           | LAMOTRIGINE tabs 100mg                 | 94091990  |
|           | LAMOTRIGINE tabs 100mg                 | 94084990  |
|           | LAMOTRIGINE tabs 100mg                 | 94064990  |
|           | LAMOTRIGINE tabs 100mg                 | 94047990  |
|           | LAMOTRIGINE tabs 100mg                 | 94011990  |
|           | LAMOTRIGINE tabs 100mg                 | 93971990  |
|           | LAMOTRIGINE tabs 100mg                 | 93937990  |
|           | LAMOTRIGINE tabs 100mg                 | 93880990  |
|           | LAMOTRIGINE tabs 100mg                 | 93807990  |
|           | LAMOTRIGINE tabs 100mg                 | 93594990  |
|           | LAMOTRIGINE tabs 100mg                 | 93491990  |
|           | Lamotrigine tabs 100mg 56 tablet(s)    | 95444997  |
|           | LAMOTRIGINE tabs 200mg                 | 94117990  |
|           | LAMOTRIGINE tabs 200mg                 | 94102990  |
|           | LAMOTRIGINE tabs 200mg                 | 94096990  |
|           | LAMOTRIGINE tabs 200mg                 | 94090990  |
|           | LAMOTRIGINE tabs 200mg                 | 94083990  |
|           | LAMOTRIGINE tabs 200mg                 | 94063990  |
|           | LAMOTRIGINE tabs 200mg                 | 94046990  |
|           | LAMOTRIGINE tabs 200mg                 | 94010990  |
|           | LAMOTRIGINE tabs 200mg                 | 93970990  |
|           | LAMOTRIGINE tabs 200mg                 | 93936990  |
|           | LAMOTRIGINE tabs 200mg                 | 93879990  |
|           | LAMOTRIGINE tabs 200mg                 | 93806990  |
|           | LAMOTRIGINE tabs 200mg                 | 93593990  |
|           | LAMOTRIGINE tabs 200mg                 | 93490990  |
|           | LAMOTRIGINE tabs 200mg                 | 91596998  |
|           | Lamotrigine tabs 200mg 30 tablet(s)    | 91465998  |
|           | LAMOTRIGINE tabs 25mg                  | 95404996  |

| Drug Name              | Generic                                                | Drug Code |
|------------------------|--------------------------------------------------------|-----------|
|                        | LAMOTRIGINE tabs 25mg                                  | 94120990  |
|                        | LAMOTRIGINE tabs 25mg                                  | 94105990  |
|                        | LAMOTRIGINE tabs 25mg                                  | 94099990  |
|                        | LAMOTRIGINE tabs 25mg                                  | 94093990  |
|                        | LAMOTRIGINE tabs 25mg                                  | 94086990  |
|                        | LAMOTRIGINE tabs 25mg                                  | 94066990  |
|                        | LAMOTRIGINE tabs 25mg                                  | 94049990  |
|                        | LAMOTRIGINE tabs 25mg                                  | 94013990  |
|                        | LAMOTRIGINE tabs 25mg                                  | 93973990  |
|                        | LAMOTRIGINE tabs 25mg                                  | 93939990  |
|                        | LAMOTRIGINE tabs 25mg                                  | 93882990  |
|                        | LAMOTRIGINE tabs 25mg                                  | 93809990  |
|                        | LAMOTRIGINE tabs 25mg                                  | 93596990  |
|                        | LAMOTRIGINE tabs 25mg                                  | 93493990  |
|                        | Lamotrigine tabs 25mg 42 tablet(s)                     | 95444996  |
|                        | LAMOTRIGINE tabs 50mg                                  | 95404998  |
|                        | LAMOTRIGINE tabs 50mg                                  | 94119990  |
|                        | LAMOTRIGINE tabs 50mg                                  | 94104990  |
|                        | LAMOTRIGINE tabs 50mg                                  | 94098990  |
|                        | LAMOTRIGINE tabs 50mg                                  | 94092990  |
|                        | LAMOTRIGINE tabs 50mg                                  | 94085990  |
|                        | LAMOTRIGINE tabs 50mg                                  | 94065990  |
|                        | LAMOTRIGINE tabs 50mg                                  | 94048990  |
|                        | LAMOTRIGINE tabs 50mg                                  | 94012990  |
|                        | LAMOTRIGINE tabs 50mg                                  | 93972990  |
|                        | LAMOTRIGINE tabs 50mg                                  | 93938990  |
|                        | LAMOTRIGINE tabs 50mg                                  | 93881990  |
|                        | LAMOTRIGINE tabs 50mg                                  | 93808990  |
|                        | LAMOTRIGINE tabs 50mg                                  | 93595990  |
|                        | LAMOTRIGINE tabs 50mg                                  | 93492990  |
|                        | Lamotrigine tabs 50mg 42 tablets (add-on starter pack) | 95444998  |
|                        | LEVETIRACETAM conc soln inf 500mg/5ml                  | 85968998  |
|                        | Levetiracetam conc soln inf 500mg/5ml 10 vial(s)       | 85969998  |
|                        | Levetiracetam oral liq mls 1                           | 84953998  |
|                        | LEVETIRACETAM oral soln 100mg/ml                       | 87193998  |
|                        | Levetiracetam oral soln 100mg/ml 300 mls               | 87195998  |
|                        | LEVETIRACETAM tabs 1000mg                              | 92375996  |
| LEVETIRACETAM          | Levetiracetam tabs 1000mg 60 tablet(s)                 | 89210996  |
|                        | LEVETIRACETAM tabs 250mg                               | 92375998  |
|                        | Levetiracetam tabs 250mg 60 tablet(s)                  | 89210998  |
|                        | LEVETIRACETAM tabs 500mg                               | 92375997  |
|                        | Levetiracetam tabs 500mg 60 tablet(s)                  | 89210997  |
|                        | LEVETIRACETAM tabs 750mg                               | 87194998  |
|                        | Levetiracetam tabs 750mg 60 tablet(s)                  | 87196998  |
| MEPENZOLATE<br>BROMIDE | MEPENZOLATE BROMIDE + PHENOBARBITAL tabs               | 95899998  |
|                        | Mepenzolate bromide product                            | 94428992  |

| Drug Name                        | Generic                                      | Drug Code |
|----------------------------------|----------------------------------------------|-----------|
| METHSUXIMIDE                     | METHSUXIMIDE                                 | 97736992  |
|                                  | METHSUXIMIDE                                 | 96817992  |
| METHYLPHENOBARBITAL              | METHYLPHENOBARBITAL tabs 200mg               | 98461996  |
|                                  | Methylphenobarbital tabs 200mg 100 tablet(s) | 95852996  |
|                                  | METHYLPHENOBARBITAL tabs 30mg                | 98461998  |
|                                  | Methylphenobarbital tabs 30mg 100 tablet(s)  | 95852998  |
|                                  | METHYLPHENOBARBITAL tabs 60mg                | 98461997  |
|                                  | Methylphenobarbital tabs 60mg 100 tablet(s)  | 95852997  |
| NITRAZEPAM                       | NITRAZEPAM 5mg tablets                       | 95330992  |
|                                  | NITRAZEPAM caps 5mg                          | 97268998  |
|                                  | NITRAZEPAM caps 5mg                          | 97205998  |
|                                  | Nitrazepam caps 5mg 500 capsule(s)           | 95721998  |
|                                  | Nitrazepam oral liq                          | 84200998  |
|                                  | NITRAZEPAM susp 2.5mg/5ml                    | 99125998  |
|                                  | Nitrazepam susp 2.5mg/5ml 150 mls            | 95720997  |
|                                  | NITRAZEPAM susp 5mg/5ml                      | 98088990  |
|                                  | Nitrazepam susp 5mg/5ml 500 mls              | 95720996  |
|                                  | NITRAZEPAM tabs 10mg                         | 99142989  |
|                                  | NITRAZEPAM tabs 10mg                         | 95718998  |
|                                  | Nitrazepam tabs 10mg 500 tablet(s)           | 95720998  |
|                                  | NITRAZEPAM tabs 5mg                          | 99720990  |
|                                  | NITRAZEPAM tabs 5mg                          | 99719990  |
|                                  | NITRAZEPAM tabs 5mg                          | 99718990  |
|                                  | NITRAZEPAM tabs 5mg                          | 99717990  |
|                                  | NITRAZEPAM tabs 5mg                          | 99404998  |
|                                  | NITRAZEPAM tabs 5mg                          | 99354998  |
|                                  | NITRAZEPAM tabs 5mg                          | 99142990  |
|                                  | NITRAZEPAM tabs 5mg                          | 98675990  |
|                                  | NITRAZEPAM tabs 5mg                          | 98470990  |
|                                  | NITRAZEPAM tabs 5mg                          | 97208998  |
|                                  | NITRAZEPAM tabs 5mg                          | 97207998  |
|                                  | NITRAZEPAM tabs 5mg                          | 97206998  |
|                                  | NITRAZEPAM tabs 5mg                          | 96932990  |
|                                  | NITRAZEPAM tabs 5mg                          | 96107990  |
|                                  | NITRAZEPAM tabs 5mg                          | 95995990  |
|                                  | NITRAZEPAM tabs 5mg                          | 95925990  |
|                                  | NITRAZEPAM tabs 5mg                          | 95719998  |
|                                  | NITRAZEPAM tabs 5mg                          | 95598990  |
|                                  | NITRAZEPAM tabs 5mg                          | 93894990  |
|                                  | NITRAZEPAM tabs 5mg                          | 87289998  |
| Nitrazepam tabs 5mg 28 tablet(s) | 97227998                                     |           |
| OXCARBAZEPINE                    | Oxcarbazepine oral liq mls 1                 | 83946998  |
|                                  | OXCARBAZEPINE sf oral susp 60mg/ml           | 91218998  |
|                                  | Oxcarbazepine sf oral susp 60mg/ml 250 mls   | 91839998  |
|                                  | OXCARBAZEPINE tabs 150mg                     | 92389990  |
|                                  | OXCARBAZEPINE tabs 150mg                     | 98730998  |
|                                  | OXCARBAZEPINE tabs 150mg                     | 93013990  |

| Drug Name      | Generic                                                                     | Drug Code |
|----------------|-----------------------------------------------------------------------------|-----------|
|                | OXCARBAZEPINE tabs 150mg                                                    | 92805990  |
|                | Oxcarbazepine tabs 150mg 50 tablet(s)                                       | 91625998  |
|                | OXCARBAZEPINE tabs 300mg                                                    | 92388990  |
|                | OXCARBAZEPINE tabs 300mg                                                    | 93012990  |
|                | OXCARBAZEPINE tabs 300mg                                                    | 92804990  |
|                | OXCARBAZEPINE tabs 300mg                                                    | 91626998  |
|                | Oxcarbazepine tabs 300mg 50 tablet(s)                                       | 91625997  |
|                | OXCARBAZEPINE tabs 600mg                                                    | 92387990  |
|                | OXCARBAZEPINE tabs 600mg                                                    | 93011990  |
|                | OXCARBAZEPINE tabs 600mg                                                    | 92803990  |
|                | OXCARBAZEPINE tabs 600mg                                                    | 89231998  |
|                | Oxcarbazepine tabs 600mg 50 tablet(s)                                       | 91625996  |
| PARAMETHADOINE | PARAMETHADOINE                                                              | 97867992  |
|                | PARAMETHADOINE                                                              | 95387992  |
|                | PHENOBARBITAL                                                               | 98087997  |
|                | PHENOBARBITAL                                                               | 87191998  |
|                | PHENOBARBITAL                                                               | 87030998  |
|                | PHENOBARBITAL + BELLADONNA ALUMINIUM HYDROXIDE & MAGNESIUM TRISILICATE tabs | 94377998  |
|                | Phenobarbital caps                                                          | 84194998  |
|                | PHENOBARBITAL elixir 15mg/5ml                                               | 99457990  |
|                | PHENOBARBITAL elixir 15mg/5ml                                               | 98688990  |
|                | Phenobarbital elixir 15mg/5ml 2 litre(s)                                    | 98087998  |
|                | PHENOBARBITAL inj 15mg                                                      | 98434989  |
|                | Phenobarbital inj 15mg 1ml ampoule(s) 10                                    | 93454998  |
|                | PHENOBARBITAL inj 30mg                                                      | 98434988  |
|                | Phenobarbital inj 30mg 1ml ampoule(s) 10                                    | 93454997  |
|                | PHENOBARBITAL inj 60mg/ml                                                   | 98434990  |
|                | Phenobarbital inj 60mg/ml 1ml ampoule(s) 10                                 | 93454996  |
|                | Phenobarbital oral liq                                                      | 85235998  |
| PHENOBARBITAL  | PHENOBARBITAL oral soln 20mg/5ml                                            | 83073998  |
|                | PHENOBARBITAL SODIUM                                                        | 98739990  |
|                | PHENOBARBITAL SODIUM                                                        | 87522998  |
|                | PHENOBARBITAL SODIUM inj 200mg/ml                                           | 98111990  |
|                | PHENOBARBITAL SODIUM inj 200mg/ml                                           | 95553998  |
|                | Phenobarbital sodium inj 200mg/ml 10 1ml ampoule(s)                         | 95554998  |
|                | Phenobarbital sodium oral liq mls 1                                         | 83895998  |
|                | PHENOBARBITAL SODIUM pwr                                                    | 98764990  |
|                | Phenobarbital sodium tabs 30mg 100 tablet(s)                                | 97080998  |
|                | Phenobarbital sodium tabs 60mg 500 tablet(s)                                | 97080997  |
|                | Phenobarbital tabs                                                          | 84193998  |
|                | PHENOBARBITAL tabs 100mg                                                    | 99432990  |
|                | PHENOBARBITAL tabs 100mg                                                    | 99110990  |
|                | PHENOBARBITAL tabs 100mg                                                    | 96866990  |
|                | Phenobarbital tabs 100mg 250 tablet(s)                                      | 97202998  |
|                | PHENOBARBITAL tabs 15mg                                                     | 99458990  |
|                | PHENOBARBITAL tabs 15mg                                                     | 99124990  |

| Drug Name | Generic                               | Drug Code |
|-----------|---------------------------------------|-----------|
|           | PHENOBARBITAL tabs 15mg               | 98476996  |
|           | PHENOBARBITAL tabs 15mg               | 98112988  |
|           | PHENOBARBITAL tabs 15mg               | 98049990  |
|           | PHENOBARBITAL tabs 15mg               | 97103990  |
|           | Phenobarbital tabs 15mg 500 tablet(s) | 97203998  |
|           | PHENOBARBITAL tabs 30mg               | 99459989  |
|           | PHENOBARBITAL tabs 30mg               | 99458989  |
|           | PHENOBARBITAL tabs 30mg               | 99124989  |
|           | PHENOBARBITAL tabs 30mg               | 98476998  |
|           | PHENOBARBITAL tabs 30mg               | 98112989  |
|           | PHENOBARBITAL tabs 30mg               | 98049989  |
|           | Phenobarbital tabs 30mg 500 tablet(s) | 97203997  |
|           | PHENOBARBITAL tabs 60mg               | 99459990  |
|           | PHENOBARBITAL tabs 60mg               | 99458988  |
|           | PHENOBARBITAL tabs 60mg               | 99124988  |
|           | PHENOBARBITAL tabs 60mg               | 98476997  |
|           | PHENOBARBITAL tabs 60mg               | 98112990  |
|           | PHENOBARBITAL tabs 60mg               | 98049988  |
|           | Phenobarbital tabs 60mg 500 tablet(s) | 97203996  |
|           | PHENOBARBITONE                        | 97511992  |
|           | PHENOBARBITONE                        | 95421992  |
|           | PHENOBARBITONE                        | 95420992  |
|           | PHENOBARBITONE                        | 95419992  |
|           | PHENOBARBITONE                        | 95418992  |
|           | PHENOBARBITONE                        | 95417992  |
|           | PHENOBARBITONE                        | 95411992  |
|           | PHENOBARBITONE                        | 95409992  |
|           | PHENOBARBITONE                        | 94520992  |
|           | PHENOBARBITONE                        | 94285992  |
|           | PHENOBARBITONE                        | 94284992  |
|           | PHENOBARBITONE                        | 94283992  |
|           | PHENOBARBITONE                        | 94279992  |
|           | PHENOBARBITONE                        | 93768992  |
|           | PHENOBARBITONE                        | 93404992  |
|           | PHENOBARBITONE & PHENYTOIN            | 97884992  |
|           | Phenobarbitone 15 mg cap 0            | 94282992  |
|           | Phenobarbitone 30 mg cap 0            | 94521992  |
|           | PHENOBARBITONE S/R                    | 95410992  |
|           | PHENOBARBITONE S/R                    | 94278992  |
|           | PHENOBARBITONE SODIUM                 | 94281992  |
|           | Phenobarbitone sodium 100 mg tab 0    | 93720992  |
|           | Phenobarbitone sodium 15 mg tab 0     | 95415992  |
|           | PHENOBARBITONE SODIUM ALCOHOL FREE    | 93037992  |
|           | PHENOBARBITONE/PHENYTOIN 50/100MG     | 97883992  |
|           | PHENOBARBITONE/PHENYTOIN 60/100MG     | 96386992  |

| Drug Name | Generic                                     | Drug Code |
|-----------|---------------------------------------------|-----------|
|           | PHENYTOIN                                   | 97897992  |
|           | PHENYTOIN                                   | 94525992  |
|           | PHENYTOIN                                   | 94288992  |
|           | PHENYTOIN + PHENOBARBITAL caps 100mg + 50mg | 99694998  |
|           | Phenytoin caps 100mg capsule(s) 84          | 95532998  |
|           | Phenytoin caps 25mg capsule(s) 28           | 95533997  |
|           | Phenytoin caps 300mg capsule(s) 28          | 95532996  |
|           | Phenytoin caps 50mg capsule(s) 28           | 95533996  |
|           | Phenytoin oral liq                          | 85557998  |
|           | PHENYTOIN paed tab 50mg                     | 97514997  |
|           | Phenytoin paed tab 50mg 112 tablet(s)       | 95533998  |
|           | PHENYTOIN sf susp 90mg/5ml                  | 98075990  |
|           | Phenytoin sf susp 90mg/5ml 500 mls          | 92812998  |
|           | PHENYTOIN SODIUM caps 100mg                 | 99454989  |
|           | PHENYTOIN SODIUM caps 100mg                 | 99453989  |
|           | PHENYTOIN SODIUM caps 100mg                 | 98315996  |
|           | Phenytoin sodium caps 100mg 84 capsule(s)   | 90780996  |
|           | PHENYTOIN SODIUM caps 25mg                  | 98315998  |
|           | Phenytoin sodium caps 25mg 28 capsule(s)    | 90780998  |
|           | PHENYTOIN SODIUM caps 300mg                 | 97514998  |
|           | Phenytoin sodium caps 300mg 28 capsule(s)   | 90776998  |
|           | PHENYTOIN SODIUM caps 50mg                  | 98315997  |
|           | Phenytoin sodium caps 50mg 28 capsule(s)    | 90780997  |
| PHENYTOIN | PHENYTOIN SODIUM inj 250mg/5ml              | 99692998  |
|           | PHENYTOIN SODIUM inj 250mg/5ml              | 98431990  |
|           | PHENYTOIN SODIUM inj 250mg/5ml              | 96740990  |
|           | PHENYTOIN SODIUM inj 250mg/5ml              | 92701990  |
|           | Phenytoin sodium inj 250mg/5ml 5 ampoule(s) | 95531998  |
|           | Phenytoin sodium oral liq mls 1             | 83896998  |
|           | PHENYTOIN SODIUM tabs 100mg                 | 99455989  |
|           | PHENYTOIN SODIUM tabs 100mg                 | 99453990  |
|           | PHENYTOIN SODIUM tabs 100mg                 | 99122989  |
|           | PHENYTOIN SODIUM tabs 100mg                 | 99121989  |
|           | PHENYTOIN SODIUM tabs 100mg                 | 98430990  |
|           | PHENYTOIN SODIUM tabs 100mg                 | 98110990  |
|           | PHENYTOIN SODIUM tabs 100mg                 | 97736997  |
|           | PHENYTOIN SODIUM tabs 100mg                 | 97140989  |
|           | PHENYTOIN SODIUM tabs 100mg                 | 96978990  |
|           | PHENYTOIN SODIUM tabs 100mg                 | 92614990  |
|           | Phenytoin sodium tabs 100mg tablet(s) 100   | 98090997  |
|           | PHENYTOIN SODIUM tabs 50mg                  | 99455990  |
|           | PHENYTOIN SODIUM tabs 50mg                  | 99454990  |
|           | PHENYTOIN SODIUM tabs 50mg                  | 99122990  |
|           | PHENYTOIN SODIUM tabs 50mg                  | 99121990  |
|           | PHENYTOIN SODIUM tabs 50mg                  | 98430989  |
|           | PHENYTOIN SODIUM tabs 50mg                  | 97736998  |
|           | PHENYTOIN SODIUM tabs 50mg                  | 97140990  |
|           | Phenytoin sodium tabs 50mg 28 tablet(s)     | 98090998  |



| Drug Name  | Generic                                 | Drug Code |
|------------|-----------------------------------------|-----------|
|            | PHENYTOIN SODIUM/ PHENOBARBITONE        | 97896992  |
|            | PHENYTOIN SODIUM/ PHENOBARBITONE        | 94455992  |
|            | PHENYTOIN SODIUM/ PHENOBARBITONE SODIUM | 95838992  |
|            | PHENYTOIN susp 30mg/5ml                 | 98658998  |
|            | Phenytoin susp 30mg/5ml 500 mls         | 95532997  |
|            | PHENYTOIN+ PHENOBARBITAL                | 90904998  |
|            | PIRACETAM                               | 96850992  |
|            | PIRACETAM                               | 96096992  |
|            | PIRACETAM FC tab 1200mg                 | 93059997  |
| PIRACETAM  | Piracetam fc tab 1200mg 60 tablet(s)    | 93058997  |
|            | PIRACETAM FC tab 800mg                  | 93059998  |
|            | Piracetam fc tab 800mg 90 tablet(s)     | 93058998  |
|            | PIRACETAM soln 33%                      | 93059996  |
|            | Piracetam soln 33% 300 mls              | 93058996  |
|            | PREGABALIN caps 100mg                   | 87398998  |
|            | Pregabalin caps 100mg 84 capsule(s)     | 87405998  |
|            | PREGABALIN caps 150mg                   | 87397998  |
|            | Pregabalin caps 150mg 56 capsule(s)     | 87404998  |
|            | PREGABALIN caps 200mg                   | 87396998  |
|            | Pregabalin caps 200mg 84 capsule(s)     | 87403998  |
|            | PREGABALIN caps 225mg                   | 84233998  |
|            | Pregabalin caps 225mg capsule(s) 56     | 84234998  |
| PREGABALIN | PREGABALIN caps 25mg                    | 87401998  |
|            | Pregabalin caps 25mg 56 capsule(s)      | 87408998  |
|            | PREGABALIN caps 300mg                   | 87395998  |
|            | Pregabalin caps 300mg 56 capsule(s)     | 87402998  |
|            | PREGABALIN caps 50mg                    | 87400998  |
|            | Pregabalin caps 50mg 84 capsule(s)      | 87407998  |
|            | PREGABALIN caps 75mg                    | 87399998  |
|            | Pregabalin caps 75mg 56 capsule(s)      | 87406998  |
|            | PRIMIDONE                               | 97949992  |
|            | PRIMIDONE                               | 86349998  |
|            | PRIMIDONE                               | 85466998  |
|            | PRIMIDONE                               | 85180998  |
|            | PRIMIDONE                               | 84127998  |
|            | Primidone caps                          | 85534998  |
| PRIMIDONE  | Primidone oral liq                      | 85533998  |
|            | PRIMIDONE oral susp 250mg/5ml           | 99383997  |
|            | Primidone oral susp 250mg/5ml 1 mls     | 95403997  |
|            | PRIMIDONE tabs 250mg                    | 99383998  |
|            | PRIMIDONE tabs 250mg                    | 87106998  |
|            | Primidone tabs 250mg 100 tablet(s)      | 95403998  |
|            | PRIMIDONE/PHENYTION SODIUM              | 97955992  |
|            | Rufinamide fc tab 100mg                 | 84420998  |
| RUFINAMIDE | RUFINAMIDE FC tab 100mg                 | 84417998  |
|            | Rufinamide fc tab 200mg                 | 84419998  |
|            | RUFINAMIDE FC tab 200mg                 | 84416998  |

| Drug Name        | Generic                                                     | Drug Code |
|------------------|-------------------------------------------------------------|-----------|
|                  | Rufinamide fc tab 400mg                                     | 84418998  |
|                  | RUFINAMIDE FC tab 400mg                                     | 84415998  |
|                  | Sod valproate c/r 200 mg tab 0                              | 96463992  |
|                  | Sodium valproate + valproic acid (ipu) mr granules 1000mg   | 83790998  |
|                  | SODIUM VALPROATE + VALPROIC ACID MR                         | 83709998  |
|                  | SODIUM VALPROATE + VALPROIC ACID MR granules 1000mg         | 82857998  |
|                  | Sodium valproate + valproic acid mr granules 100mg          | 83794998  |
|                  | SODIUM VALPROATE + VALPROIC ACID MR granules 100mg          | 83707998  |
|                  | Sodium valproate + valproic acid mr granules 250mg          | 83793998  |
|                  | SODIUM VALPROATE + VALPROIC ACID MR granules 250mg          | 83706998  |
|                  | Sodium valproate + valproic acid mr granules 500mg          | 83792998  |
|                  | SODIUM VALPROATE + VALPROIC ACID MR granules 500mg          | 83705998  |
|                  | SODIUM VALPROATE + VALPROIC ACID MR granules 50mg           | 83708998  |
|                  | Sodium valproate + valproic acid mr granules 750mg          | 83791998  |
|                  | SODIUM VALPROATE + VALPROIC ACID MR granules 750mg          | 83704998  |
|                  | Sodium valproate + valproic acid mr tab 200mg 100 tablet(s) | 92917998  |
| SODIUM VALPROATE | SODIUM VALPROATE + VALPROIC ACID mr tab 300mg               | 95217990  |
|                  | Sodium valproate + valproic acid mr tab 300mg 100 tablet(s) | 92917997  |
|                  | SODIUM VALPROATE + VALPROIC ACID mr tab 500mg               | 95216990  |
|                  | Sodium valproate + valproic acid mr tab 500mg 100 tablet(s) | 92917996  |
|                  | SODIUM VALPROATE crushable tab 100mg                        | 97910990  |
|                  | SODIUM VALPROATE crushable tab 100mg                        | 96676990  |
|                  | SODIUM VALPROATE crushable tab 100mg                        | 94409996  |
|                  | Sodium valproate crushable tab 100mg 100 tablet(s)          | 94568998  |
|                  | SODIUM VALPROATE ec tab 200mg                               | 98929990  |
|                  | SODIUM VALPROATE ec tab 200mg                               | 98385990  |
|                  | SODIUM VALPROATE ec tab 200mg                               | 97911989  |
|                  | SODIUM VALPROATE ec tab 200mg                               | 97910989  |
|                  | SODIUM VALPROATE ec tab 200mg                               | 97721990  |
|                  | SODIUM VALPROATE ec tab 200mg                               | 96986990  |
|                  | SODIUM VALPROATE ec tab 200mg                               | 96977989  |
|                  | SODIUM VALPROATE ec tab 200mg                               | 94409998  |
|                  | SODIUM VALPROATE ec tab 200mg                               | 93444990  |
|                  | SODIUM VALPROATE ec tab 200mg                               | 92802998  |
|                  | SODIUM VALPROATE ec tab 200mg                               | 83480998  |
|                  | Sodium valproate ec tab 200mg 100 tablet(s)                 | 94606998  |

| Drug Name | Generic                                                      | Drug Code |
|-----------|--------------------------------------------------------------|-----------|
|           | SODIUM VALPROATE ec tab 500mg                                | 98929989  |
|           | SODIUM VALPROATE ec tab 500mg                                | 98385989  |
|           | SODIUM VALPROATE ec tab 500mg                                | 98084990  |
|           | SODIUM VALPROATE ec tab 500mg                                | 97911988  |
|           | SODIUM VALPROATE ec tab 500mg                                | 97910988  |
|           | SODIUM VALPROATE ec tab 500mg                                | 97721989  |
|           | SODIUM VALPROATE ec tab 500mg                                | 96986988  |
|           | SODIUM VALPROATE ec tab 500mg                                | 96977990  |
|           | SODIUM VALPROATE ec tab 500mg                                | 94409997  |
|           | SODIUM VALPROATE ec tab 500mg                                | 93443990  |
|           | SODIUM VALPROATE ec tab 500mg                                | 92802997  |
|           | SODIUM VALPROATE ec tab 500mg                                | 83479998  |
|           | Sodium valproate ec tab 500mg 100 tablet(s)                  | 94606997  |
|           | SODIUM VALPROATE inj 1000mg/10ml                             | 84088998  |
|           | Sodium valproate inj 1000mg/10ml ampoule(s) 5                | 84089998  |
|           | SODIUM VALPROATE inj 300mg/3ml                               | 85029998  |
|           | Sodium valproate inj 300mg/3ml 5 ampoule(s)                  | 85030998  |
|           | SODIUM VALPROATE mr cap 150mg                                | 84667998  |
|           | Sodium valproate mr cap 150mg 100 capsule(s)                 | 84671998  |
|           | SODIUM VALPROATE mr cap 300mg                                | 84666998  |
|           | Sodium valproate mr cap 300mg 100 capsule(s)                 | 84670998  |
|           | SODIUM VALPROATE MR granules 1000mg                          | 84664998  |
|           | Sodium valproate mr granules 1000mg sachet(s) 100            | 84668998  |
|           | SODIUM VALPROATE MR granules 500mg                           | 84665998  |
|           | Sodium valproate mr granules 500mg sachet(s) 100             | 84669998  |
|           | SODIUM VALPROATE mr tab 200mg                                | 92918998  |
|           | Sodium valproate mr tab 200mg tablet(s) 100                  | 83321998  |
|           | SODIUM VALPROATE mr tab 300mg                                | 92918997  |
|           | SODIUM VALPROATE mr tab 300mg                                | 88177998  |
|           | Sodium valproate mr tab 300mg 100 tablet(s)                  | 92345998  |
|           | SODIUM VALPROATE mr tab 500mg                                | 92918996  |
|           | SODIUM VALPROATE mr tab 500mg                                | 88178998  |
|           | Sodium valproate mr tab 500mg 100 tablet(s)                  | 90505998  |
|           | Sodium valproate oral liq mls 1                              | 83766998  |
|           | SODIUM VALPROATE powdr/inj.soln 400mg                        | 94408996  |
|           | Sodium valproate powdr/inj.soln 400mg 1 400mg vial + diluent | 93148998  |
|           | SODIUM VALPROATE sf liq 200mg/5ml                            | 98929988  |
|           | SODIUM VALPROATE sf liq 200mg/5ml                            | 97911990  |
|           | SODIUM VALPROATE sf liq 200mg/5ml                            | 96159990  |
|           | SODIUM VALPROATE sf liq 200mg/5ml                            | 94408997  |
|           | SODIUM VALPROATE sf liq 200mg/5ml                            | 92802996  |
|           | Sodium valproate sf liq 200mg/5ml 300 mls                    | 94568997  |
|           | Sodium valproate supp                                        | 84720998  |
|           | SODIUM VALPROATE syrp 200mg/5ml                              | 97697990  |
|           | SODIUM VALPROATE syrp 200mg/5ml                              | 96986989  |
|           | SODIUM VALPROATE syrp 200mg/5ml                              | 95810990  |
|           | SODIUM VALPROATE syrp 200mg/5ml                              | 94408998  |

| Drug Name   | Generic                                                      | Drug Code |
|-------------|--------------------------------------------------------------|-----------|
|             | Sodium valproate syrp 200mg/5ml 300 mls                      | 94568996  |
|             | VALPROIC ACID (AS SEMISODIUM SALT) ec tab 250mg              | 94068998  |
|             | Valproic acid (as semisodium salt) ec tab 250mg 90 tablet(s) | 97628998  |
|             | VALPROIC ACID (AS SEMISODIUM SALT) ec tab 500mg              | 94068997  |
|             | Valproic acid (as semisodium salt) ec tab 500mg 90 tablet(s) | 97628997  |
|             | VALPROIC ACID ec soft gelatin ca 150mg                       | 93016998  |
|             | Valproic acid ec soft gelatin ca 150mg 100 capsule(s)        | 93015998  |
|             | VALPROIC ACID ec soft gelatin ca 300mg                       | 93016997  |
|             | Valproic acid ec soft gelatin ca 300mg 100 capsule(s)        | 93015997  |
|             | VALPROIC ACID ec soft gelatin ca 500mg                       | 93016996  |
|             | Valproic acid ec soft gelatin ca 500mg 100 capsule(s)        | 93015996  |
|             | STIRIPENTOL caps 250mg                                       | 84094998  |
|             | Stiripentol caps 250mg capsule(s) 60                         | 84098998  |
|             | STIRIPENTOL caps 500mg                                       | 84093998  |
| STIRIPENTOL | Stiripentol caps 500mg capsule(s) 60                         | 84097998  |
|             | STIRIPENTOL sach 250mg                                       | 84092998  |
|             | Stiripentol sach 250mg sachet(s) 60                          | 84096998  |
|             | STIRIPENTOL sach 500mg                                       | 84091998  |
|             | Stiripentol sach 500mg sachet(s) 60                          | 84095998  |
|             | SULTHIAME                                                    | 98152992  |
|             | SULTHIAME                                                    | 98148992  |
| SULTHIAME   | SULTHIAME                                                    | 98147992  |
|             | SULTHIAME                                                    | 95361992  |
|             | SULTHIAME                                                    | 94256992  |
|             | SULTHIAME                                                    | 94033992  |
|             | TIAGABINE tabs 10mg                                          | 99880998  |
|             | TIAGABINE tabs 10mg                                          | 89408997  |
|             | Tiagabine tabs 10mg 100 tablet(s)                            | 89409997  |
|             | TIAGABINE tabs 15mg                                          | 90858998  |
| TIAGABINE   | TIAGABINE tabs 15mg                                          | 89408996  |
|             | Tiagabine tabs 15mg 100 tablet(s)                            | 89409996  |
|             | TIAGABINE tabs 5mg                                           | 98200998  |
|             | TIAGABINE tabs 5mg                                           | 89408998  |
|             | Tiagabine tabs 5mg 100 tablet(s)                             | 89409998  |
|             | TOPIRAMATE caps 15mg                                         | 92285990  |
|             | TOPIRAMATE caps 15mg                                         | 92293990  |
|             | TOPIRAMATE caps 15mg                                         | 88868998  |
|             | Topiramate caps 15mg 60 capsule(s)                           | 91044997  |
| TOPIRAMATE  | TOPIRAMATE caps 25mg                                         | 92284990  |
|             | TOPIRAMATE caps 25mg                                         | 92292990  |
|             | TOPIRAMATE caps 25mg                                         | 88868997  |
|             | Topiramate caps 25mg 60 capsule(s)                           | 91044996  |
|             | TOPIRAMATE caps 50mg                                         | 92283990  |

| Drug Name  | Generic                                | Drug Code |
|------------|----------------------------------------|-----------|
|            | TOPIRAMATE caps 50mg                   | 92291990  |
|            | TOPIRAMATE caps 50mg                   | 88868996  |
|            | Topiramate caps 50mg 60 capsule(s)     | 88396998  |
|            | Topiramate oral liq                    | 84729998  |
|            | TOPIRAMATE tabs 100mg                  | 92198990  |
|            | TOPIRAMATE tabs 100mg                  | 92280990  |
|            | TOPIRAMATE tabs 100mg                  | 92296990  |
|            | TOPIRAMATE tabs 100mg                  | 92331990  |
|            | TOPIRAMATE tabs 100mg                  | 91051997  |
|            | Topiramate tabs 100mg 60 tablet(s)     | 91050997  |
|            | TOPIRAMATE tabs 200mg                  | 92197990  |
|            | TOPIRAMATE tabs 200mg                  | 92279990  |
|            | TOPIRAMATE tabs 200mg                  | 92295990  |
|            | TOPIRAMATE tabs 200mg                  | 92330990  |
|            | TOPIRAMATE tabs 200mg                  | 91051996  |
|            | Topiramate tabs 200mg 60 tablet(s)     | 91050996  |
|            | TOPIRAMATE tabs 25mg                   | 92200990  |
|            | TOPIRAMATE tabs 25mg                   | 92282990  |
|            | TOPIRAMATE tabs 25mg                   | 92298990  |
|            | TOPIRAMATE tabs 25mg                   | 92333990  |
|            | TOPIRAMATE tabs 25mg                   | 91045998  |
|            | Topiramate tabs 25mg 60 tablet(s)      | 91044998  |
|            | TOPIRAMATE tabs 50mg                   | 92199990  |
|            | TOPIRAMATE tabs 50mg                   | 92281990  |
|            | TOPIRAMATE tabs 50mg                   | 92297990  |
|            | TOPIRAMATE tabs 50mg                   | 92332990  |
|            | TOPIRAMATE tabs 50mg                   | 91051998  |
|            | Topiramate tabs 50mg 60 tablet(s)      | 91050998  |
| TROXIDONE  | TROXIDONE                              | 95690992  |
|            | VIGABATRIN                             | 93770996  |
|            | Vigabatrin oral liq                    | 83797998  |
| VIGABATRIN | VIGABATRIN sf powdr 500mg              | 93769997  |
|            | Vigabatrin sf powdr 500mg 50 sachet(s) | 93770997  |
|            | VIGABATRIN tabs 500mg                  | 93769998  |
|            | Vigabatrin tabs 500mg 100 tablet(s)    | 93770998  |
|            | ZONISAMIDE caps 100mg                  | 86841998  |
|            | Zonisamide caps 100mg 56 capsule(s)    | 86844998  |
| ZONISAMIDE | ZONISAMIDE caps 25mg                   | 86843998  |
|            | Zonisamide caps 25mg 14 capsule(s)     | 86846998  |
|            | ZONISAMIDE caps 50mg                   | 86842998  |
|            | Zonisamide caps 50mg 56 capsule(s)     | 86845998  |

Supplemental Table 4: Comparison of practice characteristics who are active versus withdrawn or merged.

|                                                                                                     | All            | Active         | Withdrawn/Merged |
|-----------------------------------------------------------------------------------------------------|----------------|----------------|------------------|
| <b>Average Practice Size*</b>                                                                       |                |                |                  |
| Number of practices                                                                                 | 774            | 392            | 382              |
| Mean (SD)                                                                                           | 1046 (558)     | 1029 (553)     | 1064 (564)       |
| Median [Q1-Q3]                                                                                      | 962 [602-1380] | 935 [619-1366] | 1005 [594-1416]  |
| <b>Country, n(%)**</b>                                                                              |                |                |                  |
| England                                                                                             | 507 (66%)      | 139 (35%)      | 368 (96%)        |
| Ireland                                                                                             | 42 (5%)        | 39 (10%)       | 3 (<1%)          |
| Scotland                                                                                            | 142 (18%)      | 132 (34%)      | 10 (3%)          |
| Wales                                                                                               | 83 (11%)       | 82 (21%)       | 1 (<1%)          |
| *Average practice sized based on the mid-year population counts of children aged 4-16 years.        |                |                |                  |
| **Data are n (%) where n is the number of practices overall and by active, withdrawn/merged status. |                |                |                  |

Supplemental Table 5. Representation of contributing ages by year

| Year | Age in years |   |   |   |   |   |    |    |    |    |    |    |    |
|------|--------------|---|---|---|---|---|----|----|----|----|----|----|----|
|      | 4            | 5 | 6 | 7 | 8 | 9 | 10 | 11 | 12 | 13 | 14 | 15 | 16 |
| 1994 |              |   |   |   |   |   |    |    |    |    |    |    |    |
| 1995 |              |   |   |   |   |   |    |    |    |    |    |    |    |
| 1996 |              |   |   |   |   |   |    |    |    |    |    |    |    |
| 1997 |              |   |   |   |   |   |    |    |    |    |    |    |    |
| 1998 | ■            |   |   |   |   |   |    |    |    |    |    |    |    |
| 1999 | ■            | ■ |   |   |   |   |    |    |    |    |    |    |    |
| 2000 | ■            | ■ | ■ |   |   |   |    |    |    |    |    |    |    |
| 2001 | ■            | ■ | ■ | ■ |   |   |    |    |    |    |    |    |    |
| 2002 | ■            | ■ | ■ | ■ | ■ |   |    |    |    |    |    |    |    |
| 2003 | ■            | ■ | ■ | ■ | ■ | ■ |    |    |    |    |    |    |    |
| 2004 | ■            | ■ | ■ | ■ | ■ | ■ | ■  |    |    |    |    |    |    |
| 2005 | ■            | ■ | ■ | ■ | ■ | ■ | ■  | ■  |    |    |    |    |    |
| 2006 | ■            | ■ | ■ | ■ | ■ | ■ | ■  | ■  | ■  |    |    |    |    |
| 2007 | ■            | ■ | ■ | ■ | ■ | ■ | ■  | ■  | ■  | ■  |    |    |    |
| 2008 | ■            | ■ | ■ | ■ | ■ | ■ | ■  | ■  | ■  | ■  | ■  |    |    |
| 2009 | ■            | ■ | ■ | ■ | ■ | ■ | ■  | ■  | ■  | ■  | ■  | ■  |    |
| 2010 | ■            | ■ | ■ | ■ | ■ | ■ | ■  | ■  | ■  | ■  | ■  | ■  | ■  |
| 2011 | ■            | ■ | ■ | ■ | ■ | ■ | ■  | ■  | ■  | ■  | ■  | ■  | ■  |
| 2012 | ■            | ■ | ■ | ■ | ■ | ■ | ■  | ■  | ■  | ■  | ■  | ■  | ■  |
| 2013 | ■            | ■ | ■ | ■ | ■ | ■ | ■  | ■  | ■  | ■  | ■  | ■  | ■  |
| 2014 | ■            | ■ | ■ | ■ | ■ | ■ | ■  | ■  | ■  | ■  | ■  | ■  | ■  |
| 2015 | ■            | ■ | ■ | ■ | ■ | ■ | ■  | ■  | ■  | ■  | ■  | ■  | ■  |
| 2016 | ■            | ■ | ■ | ■ | ■ | ■ | ■  | ■  | ■  | ■  | ■  | ■  | ■  |
| 2017 |              |   |   |   |   |   |    |    |    |    |    |    |    |

Supplemental Table 6. Definitions of the cohorts and numbers included in analyses

| Cohort      | Description                                                                                                                | Number of<br>Rolandic Epilepsy<br>Children | Analysis Set                                              |
|-------------|----------------------------------------------------------------------------------------------------------------------------|--------------------------------------------|-----------------------------------------------------------|
| Full Cohort | Children aged 0-16 years who were born during 1994–2012 and had a RE diagnosis (Read code F25y400) prior to September 2017 | 516                                        |                                                           |
|             | At least 10 years of follow-up from birth                                                                                  | <b>317</b>                                 | <b>Cumulative distribution of time to diagnosis of RE</b> |
| Sub Cohort  | Children aged between 4-16 years in the period 2000–2017 who were epilepsy-free at entry into the subcohort                | 485                                        |                                                           |
|             | Restricted analysis up to 2014 due to the increase in withdrawn GP practices from 2015 onwards                             | 443                                        |                                                           |
|             | From practices with available mid-year population counts                                                                   | <b>379</b>                                 | <b>Incidence Sample</b>                                   |



Supplemental Figure 1. Percentage with exact 95% CIs of children with Rolandic epilepsy in the incidence sample with a record of taking any AED medication over years 2000 to 2014 by age group.

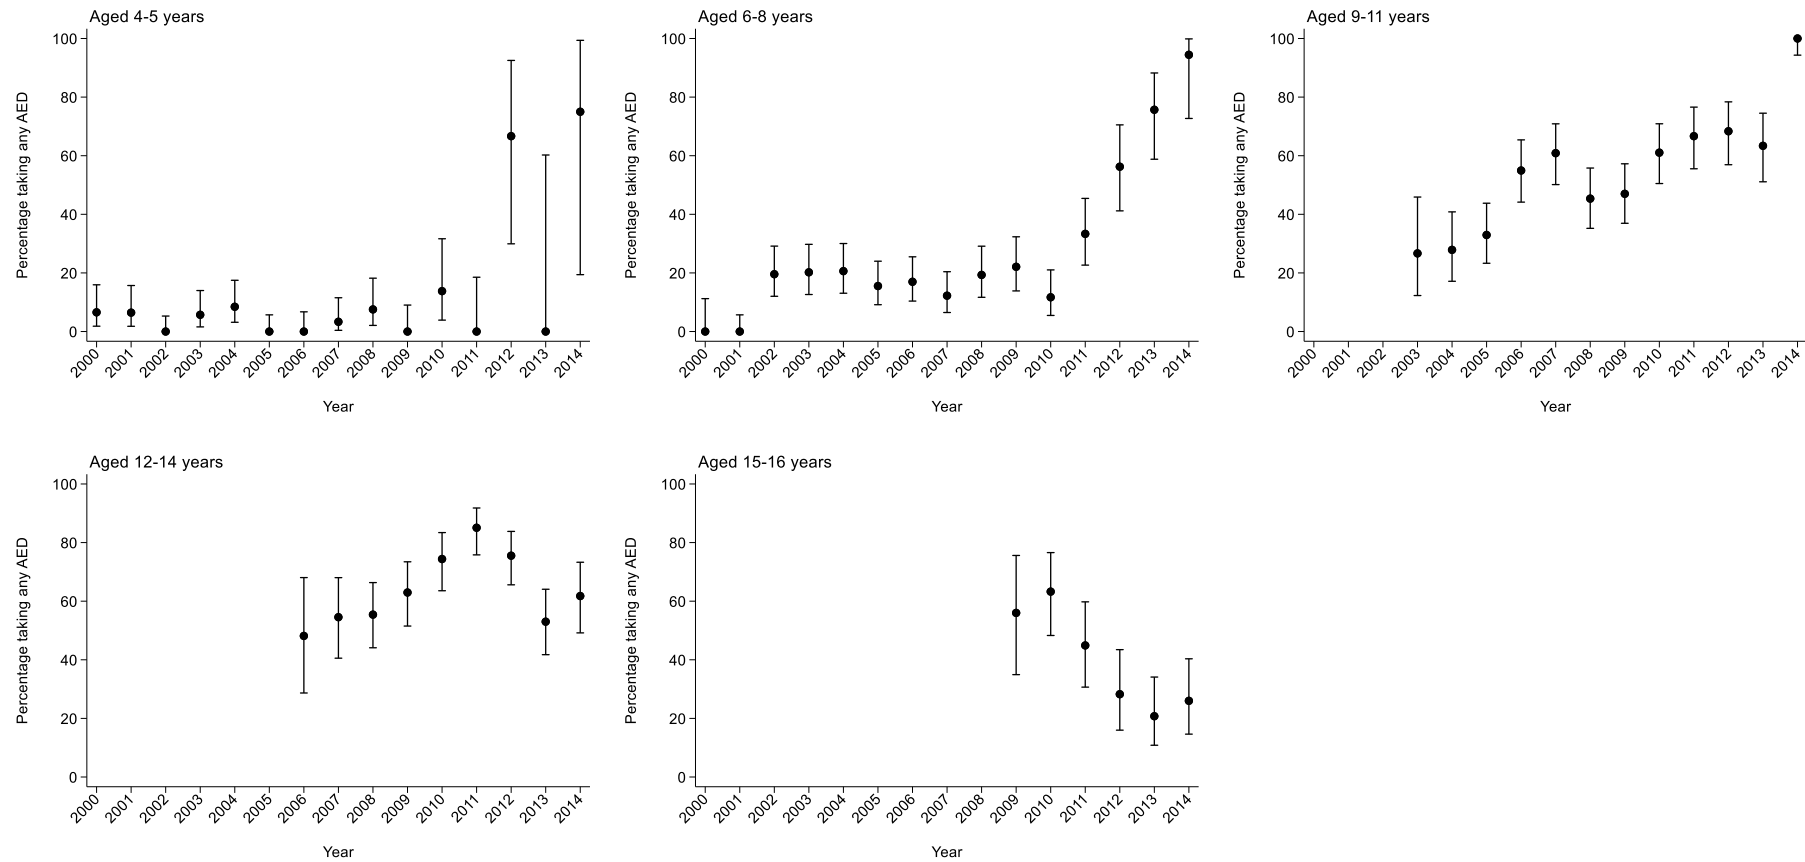

Supplement: archdischild-2019-318212supp001.pdf [file archdischild-2019-318212supp001.pdf]
